# Supplementary material
Source: publisher figshare collection journal article supplement (https://diabetesjournals.figshare.com/articles/dataset/_/19566082)
Supplement: Supplementary file 1 [file 1]

|                                                                             |                                      |                                      |                                      |                                      |                                      |                                      |  |  |
|-----------------------------------------------------------------------------|--------------------------------------|--------------------------------------|--------------------------------------|--------------------------------------|--------------------------------------|--------------------------------------|--|--|
| Origin/source of islets <sup>b</sup>                                        | IIDP                                 | IIDP                                 | IIDP                                 | IIDP                                 | IIDP                                 | IIDP                                 |  |  |
| Islet isolation centre                                                      | Qilu Hospital of Shandong University |  |  |
| Donor history of diabetes? Yes/No                                           | No                                   | No                                   | No                                   | No                                   | No                                   | No                                   |  |  |
| <b>If Yes, complete the next two lines if this information is available</b> |                                      |                                      |                                      |                                      |                                      |                                      |  |  |
| Diabetes duration (years)                                                   |                                      |                                      |                                      |                                      |                                      |                                      |  |  |
| Glucose-lowering therapy at time of death <sup>c</sup>                      |                                      |                                      |                                      |                                      |                                      |                                      |  |  |

| RECOMMENDED INFORMATION |  |  |  |  |  |  |  |  |
|-------------------------|--|--|--|--|--|--|--|--|
| Donor cause of death    |  |  |  |  |  |  |  |  |
| Warm ischaemia time (h) |  |  |  |  |  |  |  |  |
| Cold ischaemia time (h) |  |  |  |  |  |  |  |  |
| Estimated purity (%)    |  |  |  |  |  |  |  |  |

|                                                                                   |  |  |  |  |  |  |  |  |
|-----------------------------------------------------------------------------------|--|--|--|--|--|--|--|--|
| Estimated viability (%)                                                           |  |  |  |  |  |  |  |  |
| Total culture time (h) <sup>d</sup>                                               |  |  |  |  |  |  |  |  |
| Glucose-stimulated insulin secretion or other functional measurement <sup>e</sup> |  |  |  |  |  |  |  |  |
| Handpicked to purity? Yes/No                                                      |  |  |  |  |  |  |  |  |
| Additional notes                                                                  |  |  |  |  |  |  |  |  |

<sup>a</sup>If you have used more than eight islet preparations, please complete additional forms as necessary

<sup>b</sup>For example, IIDP, ECIT, Alberta IsletCore

<sup>c</sup>Please specify the therapy/therapies

<sup>d</sup>Time of islet culture at the isolation centre, during shipment and at the receiving laboratory

<sup>e</sup>Please specify the test and the results
